# Supplementary material for: Autophagy Attenuation Hampers Progesterone Synthesis during the Development of Pregnant Corpus Luteum
Source: PubMed Central journal article supplement (PMC7016947; doi:10.3390/cells9010071), 2019-12-27
Supplement: cells-09-00071-s001.pdf [file cells-09-00071-s001.pdf]

Supplementary Materials

# Autophagy Attenuation Hampers Progesterone Synthesis during the Development of Pregnant Corpus Luteum

Zonghao Tang <sup>1,2,†</sup>, Zhenghong Zhang <sup>1,†</sup>, Hong Zhang <sup>1,†</sup>, Yuhua Wang <sup>1</sup>, Yan Zhang <sup>1</sup>, Jiuhua Zhao <sup>1</sup>, Hongqin Yang <sup>1,\*</sup> and Zhengchao Wang <sup>1,\*</sup>

<sup>1</sup> Provincial Key Laboratory for Developmental Biology and Neurosciences, Key Laboratory of Optoelectronic Science and Technology for Medicine of Ministry of Education, College of Life Sciences, Fujian Normal University, Fuzhou 350007, China; tangzonghao@163.com (Z.T.); zhangzh@fjnu.edu.cn (Z.Z.); ZhHong0898@163.com (H.Z.); yuhwang@fjnu.edu.cn (Y.W.); yanzhang970118@sina.com (Y.Z.); zhao9hua@126.com (J.Z.)

<sup>2</sup> Drug Discovery Research Center, Southwest Medical University, Luzhou 646000, China

\* Correspondence: hqyang@fjnu.edu.cn (H.Y.); zcwang@fjnu.edu.cn (Z.W.)

† Authors have equal contribution.

Received: 11 October 2019; Accepted: 24 December 2019; Published: date

## 1. Supplementary Figure 1

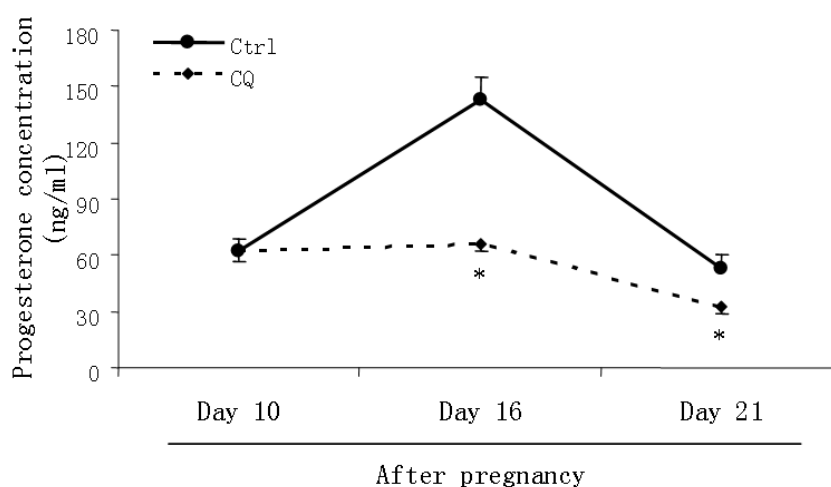

**Supplementary Figure 1.** Changes of serum progesterone levels during the luteal development of pregnant rats treated with chloroquine. In order to further determine the possible roles of autophagy, chloroquine (CQ, i.p. 20 mg/kg body weight, Sigma-Aldrich) was injected according to the method described by Choi et al. Briefly, chloroquine was dissolved with sterile saline and then pregnant rats were consecutively treated for 5 days (i.p.) before samples collection, saline was served as the control/vehicle. All pregnant rats were executed at three designed time points, including Day 10 when progesterone surging, Day 16 when CL status or functions at noon and Day 21 when circulatory progesterone level dramatically decreased. Each value represents the mean  $\pm$  SE,  $n = 3$ . One-way analysis of variance (ANOVA) was used to analyze the data. \*:  $p < 0.05$ , vs. Ctrl. CQ: chloroquine, an autophagy inhibitor.

## 2. Supplementary Table 1

Supplementary Table 1. Antibody informations for western blotting.

| Antibody Name     | Company and City                                   | Catalogue Number | Dilution Degree |
|-------------------|----------------------------------------------------|------------------|-----------------|
| LC-3              | Abcam, Cambridge, MA, USA                          | ab128025         | 1:1000          |
| Beclin1           | Protein Tech Group, Wuhan, China                   | 11306-1-AP       | 1:2000          |
| $\beta$ -actin    | Protein Tech Group, Wuhan, China                   | 20536-1-AP       | 1:5000          |
| LAMP-2            | Protein Tech Group, Wuhan, China                   | 27823-1-AP       | 1:500           |
| p62               | Abcam, Cambridge, MA, USA                          | ab109012         | 1:1000          |
| pAkt (S473)       | Cell Signaling Technology, Boston, MA, USA         | 4060             | 1:1000          |
| Akt               | Cell Signaling Technology, Boston, MA, USA         | 4691             | 1:1000          |
| mTOR              | Protein Tech Group, Wuhan, China                   | 20657-1-AP       | 1:500           |
| p-p70S6K (Thr389) | Cell Signaling Technology, Boston, MA, USA         | 97596            | 1:1000          |
| COXIV             | Protein Tech Group, Wuhan, China                   | 11242-1-AP       | 1:2000          |
| VDAC1             | Protein Tech Group, Wuhan, China                   | 10866-1-AP       | 1:500           |
| cytochrome C      | Protein Tech Group, Wuhan, China                   | 66264-1-Ig       | 1:2000          |
| HIF-1 $\alpha$    | Santa Cruz Biotechnology, Dallas, TX, US           | sc-13515         | 1:500           |
| BNIP3             | Abcam, Cambridge, MA, USA                          | ab10433          | 1:1000          |
| PINK1             | Affinity Biosciences, Cincinnati, OH USA           | DF7742           | 1:1000          |
| anti-Mouse IgG    | Beyotime Institute of Biotechnology, Haimen, China | A7028            | 1:5000          |
| anti-Rabbit IgG   | Beyotime Institute of Biotechnology, Haimen, China | A7016            | 1:5000          |
